# Supplementary material for: Prolonged Diagnostic Intervals as Marker of Missed Diagnostic Opportunities in Bladder and Kidney Cancer Patients with Alarm Features: A Longitudinal Linked Data Study
Source: PubMed Central journal article supplement (PMC7796444; doi:10.3390/cancers13010156), 2021-01-05
Supplement: cancers-13-00156-s001.pdf [file cancers-13-00156-s001.pdf]

**S1: List of CPRD Medcodes used to define clinical features**

| Medcode | Description |
|---------|-------------|
|---------|-------------|

| <b>Visible haematuria</b>      |                                                            |
|--------------------------------|------------------------------------------------------------|
| 6901                           | Clot haematuria                                            |
| 7232                           | Frank haematuria                                           |
| 9651                           | Painless haematuria                                        |
| 35555                          | Urine: red - blood                                         |
| <b>Non-visible haematuria</b>  |                                                            |
| 2784                           | Microscopic haematuria                                     |
| 13915                          | RBCs- red blood cells in urine                             |
| 13919                          | Urine: trace non-haemol. blood                             |
| 13929                          | Urine blood test = +++                                     |
| 13932                          | Urine: trace haemolysed blood                              |
| 13934                          | Urine blood test = +                                       |
| 19792                          | Urine blood test = ++                                      |
| 29463                          | Urine microscopy:RBC's present                             |
| <b>Non-specific haematuria</b> |                                                            |
| 507                            | Haematuria                                                 |
| 6030                           | Haematuria - symptom                                       |
| 6234                           | Blood in urine - symptom                                   |
| 6659                           | Blood in urine - haematuria                                |
| 7164                           | Recurrent benign haematuria syndrome                       |
| 17060                          | Recurrent and persistent haematuria                        |
| 19361                          | Traumatic haematuria                                       |
| 20357                          | Painful haematuria                                         |
| 44541                          | Recurrent and persistent haematuria, dense deposit disease |
| 47228                          | Essential haematuria                                       |

| <b>Urinary tract infections</b> |                                                 |
|---------------------------------|-------------------------------------------------|
| 150                             | Urinary tract infection, site not specified NOS |
| 389                             | Cystitis                                        |
| 532                             | Dysuria                                         |
| 1289                            | Urinary tract infection, site not specified     |
| 1353                            | Recurrent cystitis                              |
| 1572                            | Recurrent urinary tract infection               |
| 1899                            | Pyelonephritis unspecified                      |
| 2546                            | Acute pyelonephritis                            |
| 2602                            | Cystitis of pregnancy                           |
| 2650                            | Chronic urinary tract infection                 |
| 2939                            | Calculous pyelonephritis                        |
| 2985                            | Recurrent UTI                                   |

|       |                                                 |
|-------|-------------------------------------------------|
| 3469  | Chronic cystitis unspecified                    |
| 4498  | [D]Painful urination                            |
| 5350  | [D]Dysuria                                      |
| 7014  | C/O - ureteric pain                             |
| 7579  | Suspected UTI                                   |
| 8433  | Urethral pain                                   |
| 9378  | Recurrent urinary tract infections              |
| 10295 | Acute gonococcal cystitis                       |
| 10515 | Recurrent urinary tract infection               |
| 10857 | Other specified cystitis                        |
| 11315 | Other chronic cystitis NOS                      |
| 12484 | Cystitis NOS                                    |
| 12570 | Post operative urinary tract infection          |
| 14644 | UTI - urinary tract infection in pregnancy      |
| 15074 | Acute cystitis                                  |
| 15599 | [D]Dysuria NOS                                  |
| 15787 | Urethral and urinary tract disorders NOS        |
| 22682 | Cystitis cystica                                |
| 29497 | Prostatocystitis                                |
| 30068 | Subacute cystitis                               |
| 32787 | Other chronic cystitis                          |
| 34630 | Other cystitis NOS                              |
| 38572 | Xanthogranulomatous pyelonephritis              |
| 38698 | Acute pyelonephritis NOS                        |
| 48908 | Chronic gonococcal cystitis                     |
| 49235 | Tuberculous pyelonephritis                      |
| 52859 | [X]Painful micturition, unspecified             |
| 53122 | [X]Psychogenic dysuria                          |
| 53944 | Pyelonephritis and pyonephrosis unspecified     |
| 55781 | Psychogenic dysuria                             |
| 59121 | Unspecified pyelonephritis NOS                  |
| 64482 | Acute pyelonephritis without medullary necrosis |
| 70189 | [X]Other cystitis                               |
| 72686 | [X]Other chronic cystitis                       |
| 95710 | Pyelonephritis in diseases EC                   |
| 97002 | Urinary tract infection                         |
| 583   | Urgency of micturition                          |
| 4103  | Polyuria                                        |
| 7300  | Suprapubic pain                                 |
| 8028  | [D] Urgency of micturition                      |
| 8904  | Urine smell                                     |
| 15389 | [D]Vesical tenesmus                             |
| 16399 | [D]Polyuria                                     |

|       |                                             |
|-------|---------------------------------------------|
| 19983 | Urine smell NOS                             |
| 20475 | [D]Suprapubic pain                          |
| 23662 | [D]Micturition frequency and polyuria       |
| 23841 | Urine smell abnormal                        |
| 27002 | Urine smell fishy                           |
| 32031 | Urine smell ammoniacal                      |
| 53830 | Polyuria                                    |
| 63898 | [D]Frequency of micturition or polyuria NOS |

| <b>Abdominal mass</b> |                                                        |
|-----------------------|--------------------------------------------------------|
| 3015                  | [D]Abdominal mass                                      |
| 5838                  | [D]Swelling, mass or lump within abdomen or pelvis     |
| 7073                  | [D]Abdominal lump                                      |
| 8731                  | O/E - abdominal mass palpated                          |
| 16370                 | [D]Swelling, mass or lump within abdomen or pelvis NOS |
| 20387                 | O/E - abdominal mass shape                             |
| 20827                 | Right iliac fossa mass                                 |
| 21301                 | O/E-abdominal mass consistency                         |
| 21575                 | O/E left lower abdominal mass                          |
| 21684                 | O/E -abd.mass fills 1 quadrant                         |
| 21686                 | O/E - abdominal mass - soft                            |
| 24034                 | [D]Umbilical mass                                      |
| 24527                 | Epigastric mass                                        |
| 34238                 | Biopsy of abdominal mass                               |
| 51626                 | O/E - abdominal mass - hard                            |
| 53736                 | [D]Lump stomach                                        |
| 59025                 | O/E - abd.mass consistency NOS                         |
| 59578                 | O/E - abd.mass movt.with resp.                         |
| 63484                 | O/E - abd. mass fills abdomen                          |
| 65538                 | O/E -abd.mass -irregular shape                         |
| 67090                 | O/E -abd.mass-upper border def                         |
| 68388                 | O/E -abd.mass -border def. NOS                         |
| 68939                 | O/E - abd.mass moves with resp                         |
| 69694                 | O/E -abd.mass-lower border def                         |
| 72512                 | O/E - abd.mass still with resp                         |
| 97889                 | O/E - abdominal mass-very hard                         |
| 98951                 | O/E - abd.mass + respn. NOS                            |
| 99958                 | O/E - abd.mass -border defined                         |
| 3006                  | [D]Groin lump                                          |
| 11442                 | [D]Umbilical lump                                      |
| 16670                 | [D]Umbilical swelling                                  |
| 21443                 | [D]Groin mass                                          |

|      |                       |
|------|-----------------------|
| 4800 | [D]Abdominal swelling |
|------|-----------------------|

| <b>Nocturia</b>             |                                      |
|-----------------------------|--------------------------------------|
| 840                         | Nocturia                             |
| 5579                        | [D]Nocturia                          |
| <b>Poor stream</b>          |                                      |
| 5038                        | Micturition stream poor              |
| 9274                        | [D]Slowing of urinary stream         |
| <b>Hesitancy</b>            |                                      |
| 7487                        | Hesitancy                            |
| <b>Urinary retention</b>    |                                      |
| 1052                        | Cannot pass urine - retention        |
| 3002                        | [D]Acute retention of urine          |
| 5039                        | [D]Chronic retention of urine        |
| 5375                        | [D]Clot retention of urine           |
| 8393                        | [D]Post operative retention of urine |
| 28017                       | [D]Retention of urine                |
| <b>Urinary incontinence</b> |                                      |
| 2213                        | Bladder: incontinent                 |
| 3283                        | H/O: stress incontinence             |
| 3887                        | Incontinence of urine                |
| 5844                        | Nocturnal enuresis                   |
| 6161                        | Stress incontinence - symptom        |
| 13421                       | Urge incontinence of urine           |
| 15918                       | [D]Incontinence of urine             |

| <b>Urolithiasis/ loin pain</b> |                                                      |
|--------------------------------|------------------------------------------------------|
| 19                             | Renal calculus                                       |
| 22                             | Bladder stone                                        |
| 23                             | Renal stone                                          |
| 24                             | Percutaneous lithotripsy of renal calculus           |
| 25                             | Ureteric calculus                                    |
| 39                             | Renal calculus NOS                                   |
| 45                             | Bladder calculus                                     |
| 47                             | Ureteric stone                                       |
| 54                             | O/E: kidney stone                                    |
| 63                             | Kidney calculus                                      |
| 65                             | Renal stone - uric acid                              |
| 112                            | Other nephroscopic lithotripsy of ureteric calculus  |
| 120                            | Percutaneous lithotripsy of calculus in gall bladder |
| 125                            | Uric acid bladder stone                              |

|     |                                            |
|-----|--------------------------------------------|
| 135 | Oxalate bladder stone                      |
| 137 | Phosphate kidney stone                     |
| 149 | O/E: renal stone NOS                       |
| 179 | Bladder calculus NOS                       |
| 184 | Phosphate bladder stone                    |
| 202 | O/E-vesical uric acid calculus             |
| 239 | Urinary calculus NOS                       |
| 298 | Urinary calculus                           |
| 325 | Calculus of kidney                         |
| 390 | O/E - bladder calculus                     |
| 415 | O/E: renal calculus                        |
| 429 | Calculus of kidney and ureter              |
| 432 | Staghorn calculus                          |
| 460 | O/E - ureteric calculus                    |
| 563 | Nephrolithiasis NOS                        |
| 592 | O/E: uric acid renal calculus              |
| 629 | Calculus of kidney with calculus of ureter |
| 630 | O/E: oxalate renal calculus                |
| 679 | Uric acid nephrolithiasis                  |
| 686 | Lower urinary tract calculus NOS           |
| 691 | O/E - urethral calculus                    |
| 693 | [X]Urolithiasis                            |
| 696 | Other lower urinary tract calculus         |
| 700 | O/E: prostatic calculus                    |
| 705 | Lower urinary tract calculus               |
| 715 | O/E: cystine renal calculus                |
| 728 | Urinary calculus in schistosomiasis        |
| 786 | O/E - bladder calculus NOS                 |
| 817 | O/E - vesical oxalate calculus             |
| 824 | Other calculus in bladder                  |
| 6   | C/O - loin pain                            |
| 8   | Renal colic                                |
| 10  | Left flank pain                            |
| 12  | Ureteric colic                             |
| 27  | C/O - renal pain                           |
| 35  | Right flank pain                           |
| 48  | [D]Renal colic                             |
| 49  | [D]Ureteric colic                          |
| 52  | Renal colic, symptom                       |
| 59  | Flank pain                                 |
| 61  | C/O - ureteric colic                       |
| 91  | [D]Renal colic, unspecified                |
| 92  | [D]Loin pain                               |

|     |                              |
|-----|------------------------------|
| 101 | O/E - renal angle tenderness |
| 139 | [D]Renal colic NOS           |

|                      |                                 |
|----------------------|---------------------------------|
| <b>Biliary colic</b> |                                 |
| 232                  | Biliary colic                   |
| 378                  | Biliary colic                   |
| 398                  | Biliary colic symptom           |
| 405                  | [D]Right upper quadrant pain    |
| 425                  | Right upper quadrant pain       |
| 421                  | Iliac fossa pain                |
| 1181                 | Right iliac fossa pain          |
| 1336                 | [D]Groin pain                   |
| 2781                 | C/O pelvic pain                 |
| 2982                 | Left iliac fossa pain           |
| 9061                 | [D]Left lower quadrant pain     |
| 9811                 | [D] Pelvic pain                 |
| 9920                 | [D]Pelvic and perineal pain     |
| 11647                | O/E - abd. pain - R.ilic        |
| 16547                | Other pelvic pain - female      |
| <b>Pelvic pain</b>   |                                 |
| 16806                | [D]Pain in right iliac fossa    |
| 16868                | [D]Pain in left iliac fossa     |
| 17223                | O/E - iliac pain on palpation   |
| 19360                | [D]Right lower quadrant pain    |
| 21583                | O/E - abd. pain - L.ilic        |
| 22608                | Lower abdominal pain            |
| 35876                | O/E - guarding - R.ilic         |
| 50662                | to other parts of lower abdomen |
| 56085                | O/E - guarding - L.ilic         |
| 3419                 | Groin sprain                    |
| 4706                 | Bony pelvic pain                |
| 7248                 | [D] Perineal pain               |
| 23715                | Ischiopubic synchondrosis       |
| 29400                | C/O perineal pain               |

|                       |                                   |
|-----------------------|-----------------------------------|
| <b>Abdominal pain</b> |                                   |
| 177                   | Abdominal pain                    |
| 290                   | Epigastric pain                   |
| 542                   | [D]Epigastric pain                |
| 716                   | [D]Abdominal cramps               |
| 1763                  | [D]Abdominal pain                 |
| 1976                  | Abdominal pain type               |
| 2056                  | [D]Abdominal colic                |
| 2234                  | [D]Recurrent acute abdominal pain |

|       |                                   |
|-------|-----------------------------------|
| 2383  | Abdominal discomfort              |
| 2657  | Abdomen feels distended           |
| 3338  | [D]Abdominal pain NOS             |
| 3978  | Upper abdominal pain              |
| 4617  | Central abdominal pain            |
| 4771  | [D]Umbilical pain                 |
| 5691  | Non-colicky abdominal pain        |
| 5782  | O/E - abdomen tender              |
| 5960  | Site of abdominal pain            |
| 7812  | Colicky abdominal pain            |
| 8362  | [D]Left upper quadrant pain       |
| 8436  | [D]Upper abdominal pain           |
| 11070 | General abdominal pain-symptom    |
| 15908 | Appendicular colic                |
| 16402 | [D]Abdominal tenderness           |
| 17636 | O/E - umbilical pain on palp.     |
| 19283 | [D]Nonspecific abdominal pain     |
| 20640 | O/E - epigastric pain on palp.    |
| 23756 | [D]Evening colic                  |
| 24627 | O/E - abd. pain - umbilical       |
| 24661 | Generalised abdominal pain        |
| 28285 | [D]Gas pain (abdominal)           |
| 29352 | Abdominal wall pain               |
| 29567 | Abdomen feels bloated             |
| 31062 | [D]Other specified abdominal pain |
| 50590 | O/E - abdominal rigidity          |
| 62927 | O/E - rebound - umbilical         |
| 62933 | O/E - guarding - umbilical        |
| 70357 | [D]Tympanites (abdominal)         |
| 73235 | O/E - abdominal rigidity NOS      |

|                      |                                                             |
|----------------------|-------------------------------------------------------------|
| <b>Low back pain</b> |                                                             |
| 153                  | Backache                                                    |
| 154                  | Low back pain                                               |
| 557                  | Backache, unspecified                                       |
| 2786                 | Backache symptom                                            |
| 3324                 | Back pain without radiation NOS                             |
| 3763                 | C/O - low back pain                                         |
| 4680                 | Spasm of back muscles                                       |
| 5023                 | Acute back pain - lumbar                                    |
| 5035                 | Injury of muscle + tendon of abdomen, lower back and pelvis |
| 5476                 | Acute back pain - disc                                      |
| 5840                 | Acute back pain with sciatica                               |

|       |                                                            |
|-------|------------------------------------------------------------|
| 5916  | Acute back pain - thoracic                                 |
| 5923  | Acute back pain - unspecified                              |
| 6472  | Backache symptom NOS                                       |
| 6704  | Back pain, unspecified                                     |
| 8241  | Backache with radiation                                    |
| 10231 | Chronic low back pain                                      |
| 12189 | Mechanical low back pain                                   |
| 24796 | Back pain worse on sneezing                                |
| 31011 | Inj/nerves+lumbar spinal cord/abdo,lower back+pelvis level |

|                             |                                  |
|-----------------------------|----------------------------------|
| <b>Abdominal distension</b> |                                  |
| 4800                        | [D]Abdominal swelling            |
| 6229                        | Abdominal distension symptom     |
| 14880                       | [D]Abdominal distension, gaseous |
| 36966                       | Abdomen feels swollen            |

|                |                                |
|----------------|--------------------------------|
| <b>Fatigue</b> |                                |
| 1147           | [D]Tiredness                   |
| 1404           | Fatigue                        |
| 1582           | Nervous exhaustion             |
| 1688           | [D]Fatigue                     |
| 1816           | Malaise - symptom              |
| 4546           | Chronic fatigue syndrome       |
| 5658           | [D]Malaise                     |
| 5751           | Tired all the time             |
| 5794           | Tiredness symptom              |
| 5814           | [D]Lassitude                   |
| 6190           | Postviral fatigue syndrome     |
| 6242           | Fatigue - symptom              |
| 7235           | Tired all the time             |
| 7529           | CFS - Chronic fatigue syndrome |
| 9127           | Post-viral fatigue syndrome    |
| 9220           | Exhaustion                     |
| 9656           | [X]Fatigue syndrome            |
| 9823           | C/O - debility - malaise       |
| 17083          | Excessive exertion exhaustion  |
| 17526          | Maternal exhaustion            |
| 17736          | Malaise/lethargy               |
| 22923          | Heat exhaustion, unspecified   |
| 23932          | [D]Malaise and fatigue NOS     |
| 24382          | [D]Senile exhaustion           |

|       |                                   |
|-------|-----------------------------------|
| 27877 | PVFS - Postviral fatigue syn      |
| 29181 | [D]Post polio exhaustion          |
| 29292 | Tiredness symptom NOS             |
| 43550 | Combat fatigue                    |
| 44215 | [D]Malaise and fatigue            |
| 70779 | [X]Combat fatigue                 |
| 97284 | Moderate chronic fatigue syndrome |
| 98512 | Mild chronic fatigue syndrome     |
| 98734 | Severe chronic fatigue syndrome   |

|                    |                                  |
|--------------------|----------------------------------|
| <b>Weight loss</b> |                                  |
| 654                | Weight decreasing                |
| 3647               | [D]Abnormal loss of weight       |
| 4663               | Abnormal weight loss             |
| 5812               | Abnormal weight loss - symptom   |
| 12398              | Complaining of weight loss       |
| 24068              | [D]Cachexia                      |
| 26473              | O/E - weight > 20% below ideal   |
| 29029              | O/E -weight 10-20% below ideal   |
| 37937              | Weight loss from baseline weight |
| 53801              | [D]Cachexia NOS                  |

|                         |                                 |
|-------------------------|---------------------------------|
| <b>Loss of appetite</b> |                                 |
| 1855                    | [D]Appetite loss                |
| 6607                    | Loss of appetite - symptom      |
| 13081                   | Reduced appetite                |
| 17203                   | [X]Psychogenic loss of appetite |

|                            |                                      |
|----------------------------|--------------------------------------|
| <b>Fever/ night sweats</b> |                                      |
| 1740                       | Night sweats                         |
| 96946                      | [D]Night sweats                      |
| 764                        | Acute rheumatic fever                |
| 1020                       | [D]Fever NOS                         |
| 2389                       | [D]Pyrexia of unknown origin         |
| 2717                       | O/E -pyrexia of unknown origin       |
| 5859                       | Feels hot/feverish                   |
| 5892                       | O/E - fever                          |
| 5927                       | H/O: rheumatic fever                 |
| 6065                       | Fever symptoms                       |
| 6086                       | Pyrexia symptoms                     |
| 7118                       | O/E - pyrexia - ? cause              |
| 8950                       | Feverish cold                        |
| 9093                       | Pyrexial cold                        |
| 9716                       | Unspecified viral haemorrhagic fever |

|       |                                           |
|-------|-------------------------------------------|
| 14744 | O/E - fever - general                     |
| 14840 | Acute rheumatic fever NOS                 |
| 16792 | [D]Pyrexial convulsion                    |
| 17722 | O/E - fever - remittent                   |
| 17989 | [D]Fever of unknown origin                |
| 18907 | Cough with fever                          |
| 19939 | Sweating fever                            |
| 20119 | [D]Hyperpyrexia NOS                       |
| 20367 | [D]Pyrexia of unknown origin NOS          |
| 21430 | Relapsing fever                           |
| 22444 | [D]Persistent fever                       |
| 23349 | [D]Chills with fever                      |
| 25311 | O/E - hyperpyrexia-> 40.5 oCEL            |
| 26478 | Malignant hyperpyrexia due to anaesthetic |
| 27231 | O/E - temperature elevated                |
| 31412 | O/E - fever - intermittent                |
| 35761 | O/E - fever - general NOS                 |
| 44756 | Rheumatic fever with heart involvement    |
| 46292 | O/E - fever NOS                           |
| 47246 | Fever with sweating                       |
| 48189 | Rheumatic fever without heart involvement |
| 49816 | Spotted fevers                            |
| 52524 | FH: Malignant hyperpyrexia                |
| 53952 | O/E - fever - acute rise                  |
| 59942 | Other specified acute rheumatic fever     |
| 63219 | Arenaviral haemorrhagic fever             |
| 66310 | O/E - fever - continuous                  |
| 73259 | O/E - fever - gradual rise                |
| 93546 | Omsk haemorrhagic fever                   |
| 96114 | [X]Unspecified viral haemorrhagic fever   |

|                |                                                             |
|----------------|-------------------------------------------------------------|
| <b>Anaemia</b> |                                                             |
| 739            | Anaemia unspecified                                         |
| 797            | Macrocytic anaemia of unspecified cause                     |
| 882            | Hypochromic - microcytic anaemia                            |
| 1702           | Normocytic anaemia due to unspecified cause                 |
| 2452           | Protein-deficiency anaemia                                  |
| 2464           | Pernicious anaemia                                          |
| 2482           | Vit B12 defic anaemia due to malabsorption with proteinuria |
| 2743           | Acute posthaemorrhagic anaemia                              |

|       |                                                      |
|-------|------------------------------------------------------|
| 2813  | Addison's anaemia                                    |
| 3326  | Haemolytic anaemias                                  |
| 3818  | Autoimmune haemolytic anaemias                       |
| 3981  | Macrocytic anaemia unspecified cause                 |
| 4080  | Folate-deficiency anaemia                            |
| 4475  | Megaloblastic anaemia                                |
| 4670  | Secondary anaemia NOS                                |
| 4952  | O/E - anaemic                                        |
| 5271  | Vitamin B12 deficiency anaemia                       |
| 6028  | Vitamin B12 deficiency anaemia, unspecified          |
| 6816  | Normocytic anaemia due to chronic blood loss         |
| 7841  | Deficiency anaemias                                  |
| 8054  | Deficiency anaemias NOS                              |
| 9537  | Other specified iron deficiency anaemia NOS          |
| 10506 | [X]Megaloblastic anaemia NOS                         |
| 10817 | Refractory anaemia with sideroblasts                 |
| 11961 | Other deficiency anaemias                            |
| 12176 | Chronic anaemia                                      |
| 12824 | O/E - pale                                           |
| 14698 | Hereditary haemolytic anaemia NOS                    |
| 15314 | Acquired haemolytic anaemia NOS                      |
| 15358 | O/E - anaemia                                        |
| 15422 | Aplastic anaemia                                     |
| 15658 | Acquired aplastic anaemia                            |
| 15913 | O/E - clinically anaemic                             |
| 15914 | O/E - profoundly anaemic                             |
| 15936 | Sideroblastic anaemia                                |
| 16052 | Refractory Anaemia                                   |
| 16109 | O/E - anaemia NOS                                    |
| 18137 | Unspecified iron deficiency anaemia                  |
| 18631 | Haemolytic anaemias NOS                              |
| 19130 | Refractory anaemia, unspecified                      |
| 19383 | Sideropenic anaemia                                  |
| 19574 | Anaemia of prematurity                               |
| 19951 | Achlorhydric anaemia                                 |
| 21127 | Iron deficiency anaemia due to dietary causes        |
| 21723 | Acquired aplastic anaemia NOS                        |
| 22531 | Glucose-6-phosphate dehydrogenase deficiency anaemia |
| 22715 | Combined B12 and folate deficiency anaemia           |
| 22890 | Refractory anaemia without                           |

|       |                                                              |
|-------|--------------------------------------------------------------|
|       | sideroblasts, so stated                                      |
| 23875 | Refractory anaemia with excess of blasts                     |
| 24870 | Folic acid deficiency anaemia                                |
| 25046 | O/E - colour pale                                            |
| 25876 | Other specified anaemias                                     |
| 26327 | Other specified deficiency anaemias                          |
| 27726 | Iron deficiency anaemia due to chronic blood loss            |
| 27771 | Acquired haemolytic anaemias                                 |
| 28768 | Other specified anaemia NOS                                  |
| 31270 | Other vitamin B12 deficiency anaemia NOS                     |
| 31550 | Secondary sideroblastic anaemia due to disease               |
| 32715 | Hypoplastic anaemia due to drug or chemical substance        |
| 32953 | Vitamin B12 deficiency anaemia due to dietary causes         |
| 33278 | Leukoerythroblastic anaemia                                  |
| 33420 | Other specified iron deficiency anaemia                      |
| 34754 | Fanconi's familial refractory anaemia                        |
| 34934 | Other specified anaemias                                     |
| 34953 | Transient hypoplastic anaemia                                |
| 35092 | [X]Other vitamin B12 deficiency anaemias                     |
| 35160 | Other anaemias NOS                                           |
| 36634 | Folate-deficiency anaemia due to dietary causes              |
| 37082 | Folate-deficiency anaemia, drug induced                      |
| 37539 | Aplastic and other anaemias                                  |
| 38327 | Microangiopathic haemolytic anaemia                          |
| 39456 | Hereditary haemolytic anaemias                               |
| 39876 | Autoimmune haemolytic anaemia NOS                            |
| 39944 | Primary cold-type haemolytic anaemia                         |
| 39967 | Other specified haemolytic anaemias                          |
| 40750 | Idiopathic hypochromic anaemia                               |
| 41142 | Idiopathic aplastic anaemia                                  |
| 41699 | Acquired sideroblastic anaemia                               |
| 42117 | Folate-deficiency anaemia NOS                                |
| 43074 | O/E - equivocally anaemic                                    |
| 43367 | Mechanical haemolytic anaemia                                |
| 43825 | Normocytic anaemia due to aplasia                            |
| 44420 | Refractory anaemia with excess of blasts with transformation |

|       |                                                            |
|-------|------------------------------------------------------------|
| 44913 | Hypoplastic anaemia - familial                             |
| 45929 | Normocytic anaemia following acute bleed                   |
| 47225 | Secondary sideroblastic anaemia due to drugs and toxins    |
| 47952 | [X]Other dietary vitamin B12 deficiency anaemia            |
| 48338 | Iron deficiency anaemia due to blood loss                  |
| 49182 | Primary warm-type haemolytic anaemia                       |
| 50495 | Acquired haemolytic anaemia with haemoglobinuria NEC       |
| 51169 | [X]Other specified anaemias                                |
| 51489 | Other specified megaloblastic anaemia NEC                  |
| 53783 | [X]Other folate deficiency anaemias                        |
| 53799 | Megaloblastic anaemia NOS                                  |
| 53846 | [X]Vitamin B12 deficiency anaemia, unspecified             |
| 55370 | Biermer's congenital pernicious anaemia                    |
| 55481 | Folate-deficiency anaemia due to malabsorption             |
| 56348 | Other specified megaloblastic anaemia NEC NOS              |
| 56756 | [M] Refractory anaemia with sideroblasts                   |
| 56973 | Myasthenic syndrome due to pernicious anaemia              |
| 57114 | Hypoplastic anaemia due to toxic cause                     |
| 57274 | Other deficiency anaemias NOS                              |
| 57575 | Secondary cold-type haemolytic anaemia                     |
| 57859 | Aplastic anaemia due to infection                          |
| 57897 | Non-autoimmune haemolytic anaemia                          |
| 57954 | Chlorotic anaemia                                          |
| 58136 | Other specified nutritional deficiency anaemia             |
| 58695 | Other specified other anaemia                              |
| 59103 | Megaloblastic anaemia due to dietary causes                |
| 60186 | [M]Refractory anaemia+excess of blasts with transformation |
| 60923 | Disorder of iron metabolism NOS                            |
| 62257 | Vitamin E deficiency anaemia                               |
| 63936 | Infective haemolytic anaemia                               |
| 64601 | Amino-acid deficiency anaemia                              |
| 64625 | Fanconi's hypoplastic anaemia                              |
|       |                                                            |

|       |                                                      |
|-------|------------------------------------------------------|
| 65351 | Hypoplastic anaemia due to infection                 |
| 66137 | Mediterranean anaemia                                |
| 66239 | Aplastic anaemia due to toxic cause                  |
| 68087 | Aplastic anaemia NOS                                 |
| 69027 | Constitutional aplastic anaemia                      |
| 69061 | Constitutional aplastic anaemia without malformation |
| 69275 | Vegan's anaemia                                      |
| 69379 | Other specified constitutional aplastic anaemia      |
| 70248 | O/E: blood looks pale                                |
| 70835 | Protein-deficiency anaemia NOS                       |
| 71840 | [X]Nutritional anaemias                              |
| 72276 | Pyridoxine-responsive sideroblastic anaemia          |
| 72721 | Other specified hereditary haemolytic anaemias       |
| 92106 | Other specified nutritional deficiency anaemia NOS   |
| 94214 | Non-autoimmune haemolytic anaemia NOS                |
| 94387 | Sideroblastic anaemia NOS                            |
| 94528 | Asiderotic anaemia                                   |
| 94921 | [M] Refractory anaemia with excess of blasts         |
| 98709 | Goat's milk anaemia                                  |
| 99308 | Other specified non-autoimmune haemolytic anaemia    |
| 99917 | [X]Haemolytic anaemias                               |
| 539   | Microcytic - hypochromic anaemia                     |
| 795   | Iron deficiency anaemias                             |
| 3265  | Other and unspecified anaemias                       |
| 4839  | Microcytic hypochromic anaemia                       |
| 15439 | Iron deficiency anaemia NOS                          |
| 29486 | Other vitamin B12 deficiency anaemias                |

## S2: Sample derivation flowchart

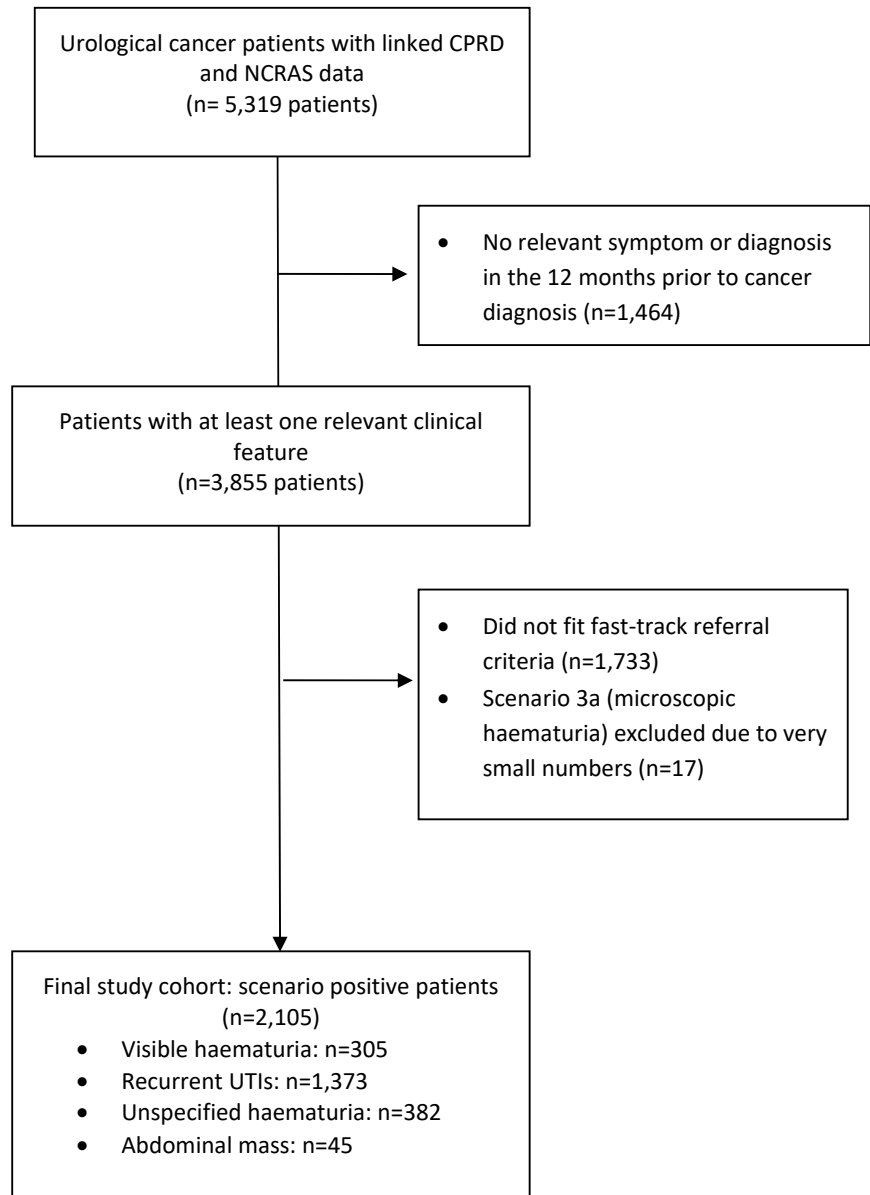



**S3: Association between patient and cancer characteristics and time to diagnosis beyond 45, 60 and 90 days**

|                               |                   | Adjusted Odds Ratio for Non-timely Diagnosis (95% CI) |          |                   |          |                   |          |
|-------------------------------|-------------------|-------------------------------------------------------|----------|-------------------|----------|-------------------|----------|
|                               |                   | Beyond 45 days                                        | p-value* | Beyond 60 days    | p-value* | Beyond 90 days    | p-value* |
| <b>Cancer Site</b>            |                   |                                                       |          |                   |          |                   |          |
| <b>Bladder</b>                | Reference         |                                                       | <0.0001  | Reference         | <0.0001  | Reference         | <0.0001  |
| <b>Kidney</b>                 | 2.32 (1.74, 3.09) |                                                       |          | 2.28 (1.75, 2.96) |          | 2.00 (1.52, 2.63) |          |
| <b>UTUC</b>                   | 3.19 (1.82, 5.58) |                                                       |          | 3.85 (2.32, 6.39) |          | 2.75 (1.72, 4.38) |          |
| <b>Scenario</b>               |                   |                                                       |          |                   |          |                   |          |
| <b>Visible haematuria</b>     | Reference         |                                                       | <0.0001  | Reference         | <0.0001  | Reference         | <0.0001  |
| <b>Recurrent UTIs</b>         | 2.08 (1.50, 2.89) |                                                       |          | 2.50 (1.81, 3.45) |          | 3.46 (2.40, 5.00) |          |
| <b>Unspecified haematuria</b> | 1.13 (0.88, 1.45) |                                                       |          | 1.19 (0.92, 1.55) |          | 1.43 (1.04, 1.98) |          |
| <b>Abdominal mass</b>         | 0.67 (0.34, 1.30) |                                                       |          | 0.92 (0.47, 1.78) |          | 1.03 (0.49, 2.20) |          |
| <b>Sex</b>                    |                   |                                                       |          |                   |          |                   |          |
| <b>Male</b>                   | Reference         |                                                       | 0.1152   | Reference         | 0.0292   | Reference         | 0.0112   |
| <b>Female</b>                 | 1.18 (0.96, 1.46) |                                                       |          | 1.25 (1.02, 1.54) |          | 1.33 (1.07, 1.66) |          |
| <b>Age group</b>              |                   |                                                       |          |                   |          |                   |          |
| <b>&lt;35</b>                 | 1.03 (0.22, 4.78) |                                                       | 0.2200   | 1.05 (0.22, 4.87) |          | 1.31 (0.24, 7.04) |          |
| <b>35-44</b>                  | 1.42 (0.65, 3.09) |                                                       |          | 1.07 (0.52, 2.22) |          | 0.75 (0.32, 1.73) |          |
| <b>45-54</b>                  | 0.88 (0.60, 1.28) |                                                       |          | 0.71 (0.49, 1.04) |          | 0.48 (0.30, 0.77) |          |
| <b>55-64</b>                  | 0.91 (0.69, 1.19) |                                                       |          | 0.84 (0.64, 1.11) |          | 0.83 (0.61, 1.14) |          |
| <b>65-74</b>                  | Reference         |                                                       |          | Reference         |          | Reference         |          |
| <b>75-84</b>                  | 1.11 (0.89, 1.39) |                                                       |          | 1.09 (0.87, 1.35) |          | 1.05 (0.82, 1.34) |          |
| <b>85+</b>                    | 1.39 (1.02, 1.91) |                                                       |          | 1.19 (0.88, 1.61) |          | 1.06 (0.76, 1.48) |          |

CI: Confidence interval; UTIs: Urinary tract infections; UTUC: Upper tract urothelial cancer

\* Joint Wald test performed for categorical variables
